# Supplementary material
Source: publisher figshare collection journal article supplement (https://frontiersin.figshare.com/ndownloader/files/16328435)
Supplement: Supplementary file [file 16328435]

**Figure S1.** Selection of patients

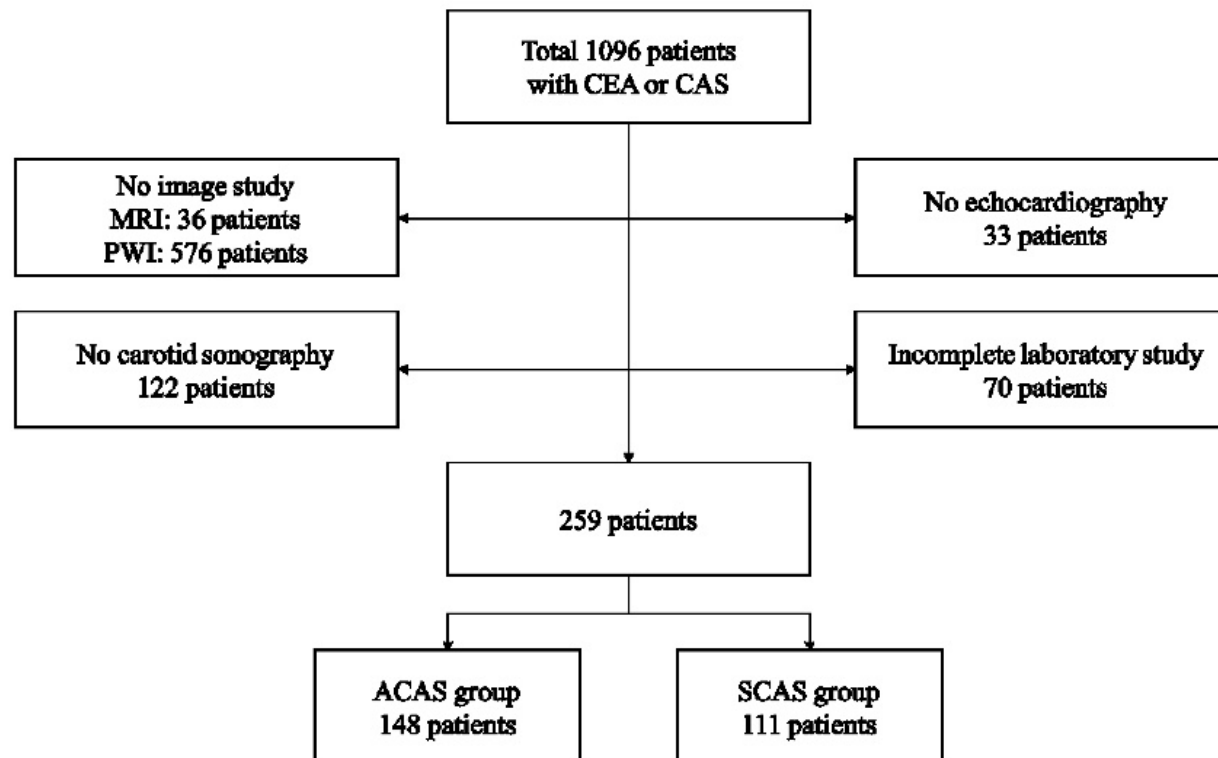

CEA, carotid endarterectomy; CAS, carotid artery stenting; MRI, magnetic resonance imaging; PWI, perfusion
